# Supplementary material for: Urinary Metabolomic Markers of Protein Glycation, Oxidation, and Nitration in Early-Stage Decline in Metabolic, Vascular, and Renal Health
Source: Hindawi journal article supplement (doi:10.1155/2019/4851323), 2019-11-19
Supplement: f1 [file 4851323.f1.pdf]

Urinary metabolomic markers of protein glycation, oxidation and nitration in early-stage decline in metabolic, vascular and renal health. Jinit Masania *et al.*

SUPPLEMENTARY TABLES

TABLE S1. Correlation analysis of clinical characteristics and urinary analytes: healthy controls.

|                  |           |            |              |                  |            |           |             |             |            |            |            |
|------------------|-----------|------------|--------------|------------------|------------|-----------|-------------|-------------|------------|------------|------------|
| <b>FL</b>        |           |            |              |                  |            |           |             |             |            |            |            |
| <b>CML</b>       | 0.45      |            |              |                  |            |           |             |             |            |            |            |
| <b>MG-H1</b>     | 0.84      | 0.43       |              |                  |            |           |             |             |            |            |            |
| <b>Pyrraline</b> | 0.43      | 0.43       | 0.43         |                  |            |           |             |             |            |            |            |
| <b>GSA</b>       |           |            |              |                  |            |           |             |             |            |            |            |
| <b>DT</b>        | 0.44      |            | 0.41         |                  |            |           |             |             |            |            |            |
| <b>GEEK</b>      |           |            |              |                  |            |           |             |             |            |            |            |
| <b>3-NT</b>      | 0.62      |            | 0.72         |                  |            |           |             |             |            |            |            |
| <b>Leu</b>       |           |            |              |                  | 0.39       |           | 0.47        |             |            |            |            |
| <b>Ile</b>       |           |            |              |                  |            |           | 0.47        |             | 0.80       |            |            |
| <b>Val</b>       |           |            |              |                  |            |           |             |             | 0.82       | 0.74       |            |
|                  | <b>FL</b> | <b>CML</b> | <b>MG-H1</b> | <b>Pyrraline</b> | <b>GSA</b> | <b>DT</b> | <b>GEEK</b> | <b>3-NT</b> | <b>Leu</b> | <b>Ile</b> | <b>Val</b> |

Spearman correlation coefficients (P<0.05 with Bonferroni correction of 20 applied). The variables compared in correlation analysis were: age, BMI, eGFR, fasting plasma glucose, fasting plasma insulin, A1C, CIMT and urinary analytes: FL, CML, MG-H1, pentosidine, glucosepane, pyrraline, dityrosine, GSA, 3-NT, GEEK, leu, ile and val.

TABLE S2. Correlation analysis of clinical characteristics and urinary analytes: impaired metabolic health

|                  |             |           |            |              |                  |            |            |           |             |             |            |            |            |
|------------------|-------------|-----------|------------|--------------|------------------|------------|------------|-----------|-------------|-------------|------------|------------|------------|
| <b>eGFR</b>      |             |           |            |              |                  |            |            |           |             |             |            |            |            |
| <b>FL</b>        |             |           |            |              |                  |            |            |           |             |             |            |            |            |
| <b>CML</b>       |             | 0.46      |            |              |                  |            |            |           |             |             |            |            |            |
| <b>MG-H1</b>     |             | 0.66      | 0.63       |              |                  |            |            |           |             |             |            |            |            |
| <b>Pyrraline</b> |             |           | 0.66       | 0.52         |                  |            |            |           |             |             |            |            |            |
| <b>GSP</b>       |             |           |            |              |                  |            |            |           |             |             |            |            |            |
| <b>GSA</b>       |             |           | 0.53       | 0.45         | 0.44             |            |            |           |             |             |            |            |            |
| <b>DT</b>        |             |           |            |              |                  | 0.45       |            |           |             |             |            |            |            |
| <b>GEEK</b>      |             |           |            |              | 0.49             |            |            |           |             |             |            |            |            |
| <b>3-NT</b>      |             | 0.51      |            | 0.71         |                  |            |            |           |             |             |            |            |            |
| <b>Leu</b>       | 0.56        |           |            |              |                  |            | 0.57       |           | 0.54        |             |            |            |            |
| <b>Ile</b>       | 0.38        |           | 0.56       | 0.57         | 0.48             |            | 0.61       |           | 0.45        |             | 0.79       |            |            |
| <b>Val</b>       | 0.50        |           | 0.48       |              |                  |            | 0.58       |           | 0.54        |             | 0.89       | 0.81       |            |
|                  | <b>eGFR</b> | <b>FL</b> | <b>CML</b> | <b>MG-H1</b> | <b>Pyrraline</b> | <b>GSP</b> | <b>GSA</b> | <b>DT</b> | <b>GEEK</b> | <b>3-NT</b> | <b>Leu</b> | <b>Ile</b> | <b>Val</b> |

Spearman correlation coefficients (P<0.05 with Bonferroni correction of 20 applied).

TABLE S3. Correlation analysis of clinical characteristics and urinary analytes: impaired vascular health.

|                    |           |            |              |                    |            |                  |            |           |             |            |            |            |  |
|--------------------|-----------|------------|--------------|--------------------|------------|------------------|------------|-----------|-------------|------------|------------|------------|--|
| <b>FL</b>          |           |            |              |                    |            |                  |            |           |             |            |            |            |  |
| <b>CML</b>         |           |            |              |                    |            |                  |            |           |             |            |            |            |  |
| <b>MG-H1</b>       | 0.74      | 0.68       |              |                    |            |                  |            |           |             |            |            |            |  |
| <b>Pentosidine</b> |           |            |              |                    |            |                  |            |           |             |            |            |            |  |
| <b>GSP</b>         |           |            |              | 0.39               |            |                  |            |           |             |            |            |            |  |
| <b>Pyrraline</b>   |           | 0.57       | 0.42         |                    |            |                  |            |           |             |            |            |            |  |
| <b>GSA</b>         |           | 0.44       |              |                    |            | 0.49             |            |           |             |            |            |            |  |
| <b>DT</b>          | 0.50      | 0.41       | 0.60         |                    |            | 0.39             |            |           |             |            |            |            |  |
| <b>3-NT</b>        | 0.65      |            | 0.70         |                    |            |                  |            | 0.44      |             |            |            |            |  |
| <b>Leu</b>         |           |            | 0.40         |                    |            |                  |            | 0.49      |             |            |            |            |  |
| <b>Ile</b>         |           |            | 0.43         |                    |            |                  | 0.40       | 0.38      |             | 0.72       |            |            |  |
| <b>Val</b>         |           |            |              | 0.42               |            |                  |            | 0.42      |             | 0.86       | 0.71       |            |  |
|                    | <b>FL</b> | <b>CML</b> | <b>MG-H1</b> | <b>Pentosidine</b> | <b>GSP</b> | <b>Pyrraline</b> | <b>GSA</b> | <b>DT</b> | <b>3-NT</b> | <b>Leu</b> | <b>Ile</b> | <b>Val</b> |  |

Spearman correlation coefficients (P<0.05 with Bonferroni correction of 20 applied).

TABLE S4. Correlation analysis of clinical characteristics and urinary analytes: impaired renal health.

|                  |            |             |           |            |              |            |                  |             |            |            |            |
|------------------|------------|-------------|-----------|------------|--------------|------------|------------------|-------------|------------|------------|------------|
| <b>Age</b>       |            |             |           |            |              |            |                  |             |            |            |            |
| <b>eGFR</b>      |            |             |           |            |              |            |                  |             |            |            |            |
| <b>FL</b>        |            |             |           |            |              |            |                  |             |            |            |            |
| <b>CML</b>       |            |             |           |            |              |            |                  |             |            |            |            |
| <b>MG-H1</b>     |            |             | 0.46      | 0.54       |              |            |                  |             |            |            |            |
| <b>GSP</b>       | 0.46       |             |           |            |              |            |                  |             |            |            |            |
| <b>Pyrraline</b> |            |             |           | 0.50       | 0.55         |            |                  |             |            |            |            |
| <b>3-NT</b>      |            |             |           |            | 0.71         |            |                  |             |            |            |            |
| <b>Leu</b>       |            | 0.60        |           |            |              |            |                  |             |            |            |            |
| <b>Ile</b>       |            | 0.56        |           |            |              |            |                  |             |            | 0.83       |            |
| <b>Val</b>       |            | 0.42        |           |            |              |            |                  |             |            | 0.79       | 0.86       |
|                  | <b>Age</b> | <b>eGFR</b> | <b>FL</b> | <b>CML</b> | <b>MG-H1</b> | <b>GSP</b> | <b>Pyrraline</b> | <b>3-NT</b> | <b>Leu</b> | <b>Ile</b> | <b>Val</b> |

Spearman correlation coefficients (P<0.05 with Bonferroni correction of 20 applied).
